1 *Original article*

2 **SARS-CoV-2 Exposures of Healthcare Workers from Primary Care, Long-Term**

3 **Care Facilities and Hospitals: A Nationwide Matched Case-Control Study**

4 Martin Belan,<sup>1</sup> Tiffany Charmet,<sup>2</sup> Laura Schaeffer,<sup>2</sup> Sarah Tubiana,<sup>1,3</sup> Xavier Duval,<sup>1,3</sup> Jean-

5 Christophe Lucet,<sup>1,4</sup> Arnaud Fontanet,<sup>2,5</sup> Gabriel Birgand,<sup>6,7\*</sup> and Solen Kernéis<sup>1,4\*</sup>

6 <sup>1</sup>Université de Paris, INSERM, IAME, Paris, France

7 <sup>2</sup>Institut Pasteur, Université de Paris, Emerging Diseases Epidemiology Unit, Paris, France

8 <sup>3</sup>Centre d'Investigation Clinique, Inserm CIC 1425, Paris, France

9 <sup>4</sup>Equipe de Prévention du Risque Infectieux (EPRI), AP-HP, Hôpital Bichat, Paris, France

10 <sup>5</sup>Conservatoire National des Arts et Métiers, Unité PACRI, Paris, France

11 <sup>6</sup>Centre d'Appui à la Prévention des Infections Associées aux Soins (CPIas) des Pays de la Loire,

12 Nantes, France

13 <sup>7</sup>NIHR Health Protection Research Unit in Healthcare-Associated Infection and Antimicrobial

14 Resistance, Imperial College London, Hammersmith Campus, London, UK

15 \*Gabriel Birgand and Solen Kernéis contributed equally to this manuscript.

16 Corresponding author: Martin Belan, Equipe Mobile d'Infectiologie, Hôpital Cochin, AP-HP, 27

17 rue du Faubourg Saint Jacques, 75679 Paris CEDEX 14, France. Tel: +33(0)1 58 41 41 83, Fax:

18 +33(0)1 58 41 17 61, email: [martin.belan@aphp.fr](mailto:martin.belan@aphp.fr)

19 Keyword: COVID-19; healthcare workers; infection control and prevention; risk factors.

20 Word count: 2327; 29 References, 2 Figures, 1 Table

21 Supplementary Data: 3 Tables.

22 **ABSTRACT**

23 **Objectives.** Healthcare workers (HCWs) are at higher risk of contracting coronavirus disease-19  
24 (COVID-19) than the general population. This study assessed the roles of various exposures and  
25 personal protective equipment (PPE) use on that risk for HCWs working in primary care, long-  
26 term-care facilities (LTCFs) or hospitals.

27 **Methods.** We conducted a matched case-control (1:1) study (10 April–9 July 2021). Cases (HCWs  
28 with confirmed COVID-19) and controls (HCWs without any COVID-19-positive test or  
29 symptoms) recruited by email were invited to complete an online questionnaire on their  
30 exposures and PPE use. Questions covered the 10 days preceding symptom onset for cases (or  
31 testing if asymptomatic) or inclusion for controls.

32 **Results.** A total of 4152 matched cases and controls were included. The multivariable  
33 conditional logistic regression analysis retained exposure to an infected person outside work  
34 (adjusted odds ratio, 19.9 [95% confidence interval, 12.4–31.9]), an infected colleague (2.26  
35 [1.53–3.33]) or COVID-19 patients (2.37 [1.66–3.40]), as independent predictors of COVID-19 in  
36 HCWs, while partial or complete immunization was protective. Eye protection (0.57 [0.37–0.87])  
37 and wearing a gown (0.58 [0.34–0.97]) during COVID-19 patient care were protective, while  
38 wearing an apron slightly increased the risk of infection (1.47 [1.00–2.18]). N95-respirator  
39 protection was comparable to that of surgical masks. Results were consistent across healthcare-  
40 facility categories.

41 **Conclusions.** HCWs were more likely to get COVID-19 in their personal sphere than during  
42 occupational activities. Our results suggest that eye protection for HCWs during patient care  
43 should be actively promoted.

## 44 INTRODUCTION

45

46 Protecting healthcare workers (HCWs) from coronavirus disease-19 (COVID-19) is critical to  
47 ensure their own safety, and maintain continuity and quality of care. HCWs are estimated to  
48 have a 1.6- to 3.4-fold higher risk of infection compared to the general population [1, 2]. High  
49 on-site involvement during the acute phases of the pandemic and lockdown periods, direct  
50 interactions with patients and lack of access to personal protective equipment (PPE) likely  
51 contributed to higher exposure. The World Health Organization estimated that between 80 000  
52 and 180 000 HCWs could have died from COVID-19 between January 2020 and May 2021 [3]. In  
53 France, from March 2020 to September 2021, 87 647 (9%) laboratory-confirmed infections and  
54 19 attributable deaths were reported among 935 732 HCWs from healthcare facilities [4]. The  
55 more recent emergence of highly transmissible variants further affected the healthcare-  
56 workforce capacity.

57 As in the general population, younger male HCWs with comorbidities, in contact with an  
58 infected household member or who participated in gathering events are at higher risk for  
59 contracting COVID-19 [5–8]. Specific occupational exposures were identified: regular patient-  
60 facing activities and contacts with infected colleagues [2, 5, 6, 9, 10]. PPE-conferred protection  
61 was mainly studied for Influenza, Severe Acute Respiratory Syndrome (SARS) and Middle East  
62 Respiratory Syndrome (MERS), but evidence is controversial for COVID-19 [11–13]. Moreover,  
63 very few data have been published on HCWs in long-term care facilities (LTCFs) and primary care  
64 [14, 15], despite their intense involvement in the pandemic response. Most studies focused on  
65 the hospital setting, although exposures, organization of care and access to infection prevention  
66 and control (IPC) expertise vary greatly across facilities.

67 This study aimed to identify occupational and non-occupational exposures, and PPE practices

68 associated with COVID-19 risk for HCWs working in primary care, LTCFs or hospitals.

69

## 70 **METHODS**

71

### 72 ***Study Design and Participants***

73 We conducted a matched case-control study from an ongoing national survey (ComCor) led by  
74 Institut Pasteur (Paris, France) since October 2020 [16–18]. The ComCor survey aims to identify  
75 COVID-19 risk factors in the general population through a case-control study on community and  
76 occupational exposures to SARS-CoV-2.

77 Participants were included between 10 April and 9 July 2021. All laboratory-confirmed cases  
78 of COVID-19 (either nasopharyngeal reverse transcriptase–polymerase chain reaction (RT-PCR)  
79 or antigenic test) compiled by the French National Health Insurance were invited by email to  
80 complete a questionnaire following their positive test result. Respondents who selected the  
81 “healthcare worker or working within health field” criterion in the questionnaire were included  
82 as cases in this study. Controls were recruited during the same period through two different  
83 sources: 1) IPSOS, a French marketing research and public opinion specialist, selected controls  
84 from a panel representative of the French population using frequency-matching with cases for  
85 age, sex, region, population density and week of inclusion for the Comcor survey; and 2) 24  
86 professional corporations, scientific associations and medical platforms were asked to forward  
87 the questionnaire to their members. Participants declaring to be HCWs using the above-  
88 described criterion and reporting no previous symptoms or positive test were enrolled as  
89 controls. The final study population was obtained by randomly selecting cases and controls with  
90 a 1:1 ratio by exact case-control matching for 10-year age-category distribution, sex and  
91 residential region.

92

93 ***Data Collection***

94 Participants received online information about the study and gave consent for participation by  
95 completing the self-administered questionnaire. They opted-in without any incentives or  
96 reminders. Questionnaires covered the 10 days preceding symptom onset for cases (or testing if  
97 asymptomatic) and the 10 days preceding inclusion for controls. As previously described, the  
98 questionnaire covered sociodemographic characteristics (age, sex, residential region, household  
99 composition), health condition (prior medical history, COVID-19-immunization status) [16].  
100 Occupational activities were assessed for cases and controls: professional category, size and  
101 type of healthcare setting, frequency of contacts with general patients and COVID-19 patients,  
102 contacts with colleagues at work, and PPE use for COVID-19 patient care during the previous 10  
103 days. HCW professions were grouped in 4 categories: medical staff (physicians, residents,  
104 dentists, pharmacists, biologists), nurses, nurse’s assistants and other professions (including,  
105 among others, laboratory or imaging technicians, administrative staff, speech or physical  
106 therapists, social workers and opticians). To account for previous immunization against SARS-  
107 CoV-2, we classified participants as either “not immunized”, “partially immunized” or “fully  
108 immunized” [17, 19]. Participants without any documented previous COVID-19, and either not  
109 vaccinated or first-dose vaccinated within the 21 days preceding inclusion were considered “not  
110 immunized”. Participants included 14 days to 6 months after laboratory-confirmed COVID-19  
111 infection or >7 days after a second vaccine dose (28 days for 1-dose regimen) were classified as  
112 fully immunized. Other participants were considered partially immunized.

113

114 ***Statistical Analyses***

115 Categorical variables are described by number (percentage). All statistical analysis were

116 computed with R Studio v4.1.0 (R Foundation for Statistical Computing, Vienna, Austria). Cases  
117 and controls were matched with the Matching package. Univariable and multivariable  
118 conditional logistic regression to account for the matching strategy, adjusted to the week of  
119 inclusion, assessed relationships between variables and the outcome (COVID-19). Missing data  
120 were managed with multiple imputations by chained equations using the MICE package. To  
121 evaluate imputation effects on our results, supplementary analysis was done on a sample of  
122 fully completed questionnaires only, excluding individuals with missing data. To compare risk  
123 factors within healthcare-setting categories (hospitals, LTCFs and primary care), subgroup  
124 analyses were conducted on three population samples using the same 1:1 matching strategy for  
125 age, sex and residential region. Strengthening of Reporting of Observational Studies in  
126 Epidemiology (STROBE) reporting guidelines were followed.

127

### 128 ***Ethical Considerations***

129 The ComCor study was approved by the *Comité de Protection des Personnes (CPP) Sud Ouest et*  
130 *Outre Mer-1* on 21 September 2020. The data protection authority *Commission Nationale de*  
131 *l'Informatique et des Libertés (CNIL)* authorized data processing on 21 October 2020. CPP and  
132 CNIL accorded authorizations for substantial modification to recruit controls through  
133 professional societies and associations on 31 March 2021. Informed consent was obtained from  
134 all participants. The study is registered with ClinicalTrials.gov under the identifier NCT04607941.

135

## 136 **RESULTS**

137

### 138 ***Participants***

139 Among 562 841 individuals with confirmed COVID-19 contacted by the French National Health

140 Insurance (10 April–9 July 2021), 6% completed the questionnaire, including 3510 HCWs, and  
141 1:1 matching paired 2076 cases to 2076 controls for analysis. Overall, data were missing for 126  
142 (6%) cases and 25 (1%) controls. The weekly number of inclusions and confirmed COVID-19  
143 cases reported in France throughout the study period are reported in Figure 2.

144 Table 1 reports study population characteristics. Most participants were female, mostly  
145 working in primary care. Overall, 1770/4152 (43%) HCWs were classified as either partially or  
146 fully immunized against COVID-19; 678/4152 (16%) declared being posted in a COVID-19-  
147 dedicated unit or mostly caring for COVID-19 patients. In the subgroup of HCWs in contact with  
148 COVID-19 patients during the preceding 10 days (n = 2086), 1616 (77%) declared systematically  
149 wearing a gown, 1608 (77%) gloves, 1490 (71%) a N95 respirator, 1345 (64%) goggles/faceshield  
150 and 1146 (55%) an apron for patient care.

151

### 152 ***Association between Exposures and COVID-19 Status***

153 According to the multivariable analysis, the strongest predictor of contracting COVID-19 was  
154 exposure to an infected person outside work, while complete or partial immunization was  
155 protective (Table 1). Occupational exposure to an infected colleague, to COVID-19 patients, or  
156 working in a unit harboring a cluster of nosocomial cases increased the risk of HCW infection.  
157 Compared to medical staff, being a nurse or a nurse's aide was significantly associated with the  
158 risk of contracting COVID-19. Eye protection (goggles or faceshield) and gowning for COVID-19-  
159 patient care were associated with lower risk, while wearing an apron posed a higher risk. N95-  
160 respirator-conferred protection was comparable to that of surgical facemasks. The  
161 supplementary analysis of cases with fully completed questionnaires (Supplementary Table 1)  
162 yielded similar results.

163

## 164 ***Subgroup and Sensitivity Analyses***

165 The subgroup analyses by healthcare sector are reported in Supplementary Tables 2 and 3.  
166 After 1:1 matching, 1388 HCWs from hospitals, 558 from LTCFs and 1842 from primary care  
167 were included. When caring for COVID-19 patients, HCWs declared more frequently wearing  
168 N95 respirators in hospitals and primary care than in LTCFs. Adherence to eye protection was  
169 particularly poor in primary care (46% of cases and 53% of controls). According to the  
170 multivariable analysis, partial or complete immunization was protective in all three settings,  
171 while exposure to an infected person outside work was again the main risk factor for infection.

172

## 173 **DISCUSSION**

174

175 In this large case-control study, the strongest predictor of HCW COVID-19 infection was  
176 exposure to an infected person outside work. Contact with an infected colleague and regular  
177 COVID-19 patient-facing activities were also significantly, but to a lesser extent, associated with  
178 infection. Eye protection and gowning during patient care decreased the risk, while N95  
179 respirators did not confer better protection than surgical masks. These results were consistent  
180 across healthcare settings (hospital, LTCFs and primary care).

181 As also shown by others, our results suggest that direct contact with infected household  
182 members, relatives or, to a lesser degree, colleagues were the main sources of HCW acquisition  
183 of COVID-19 [5, 6, 9]. Nevertheless, COVID-19 patient-facing activities seem to further enhance  
184 the risk, although previous results were heterogeneous [2, 5, 7, 9, 20, 21]. One explanation for  
185 this heterogeneity across settings and wards may be the various degrees of HCW education and  
186 training to follow IPC protocols and best practices. Correct PPE use by HCWs is essential to avoid  
187 contaminations during patient care. Since the start of the pandemic, French guidelines have



188 recommended universal masking with surgical facemasks for general patient care, and N95-  
189 respirator use for aerosol-generating procedures [22]. For confirmed COVID-19 patients,  
190 additional PPE, such as eye protection, and gowns or aprons must be worn. Gloves are  
191 restricted to activities carrying a risk of exposure to body fluids.

192 Our findings highlighted marked divergence of PPE use from French guidelines, since the  
193 large majority of HCWs declared systematically wearing a N95 respirator and gloves when caring  
194 for COVID-19 patients. However, our finding that N95 respirators were not superior to surgical  
195 facemasks for protecting HCWs during standard care is consistent with the results of a recent  
196 meta-analysis of 4 randomized controlled trials on other viral respiratory infections [11]. In a  
197 multicenter observational study in Switzerland, an institutional policy of systematic N95-  
198 respirator use was not associated with a lower HCWs' seroconversion rate for COVID-19 [23].  
199 Although additional safety conferred by eye protection was also suggested in a recent meta-  
200 analysis [24], most clinical workers find faceshields and goggles uncomfortable, impair vision  
201 and interfere with work, probably contributing to poor adherence [25]. Unexpectedly, apron use  
202 was associated with a heightened risk of contamination, while gowns were protective. The  
203 pandemic led to a widespread use or reuse of homemade aprons during COVID-19-patient care,  
204 owed to gown shortage for which donning and doffing might be easier. These observed misuses  
205 of aprons and possible lack of personal protection suits may have led to an increased risk of  
206 cross contamination during care.

207 HCWs from different healthcare settings have participated in the COVID-19 response. In  
208 France, 72% of nursing homes had at least one COVID-19-infected resident in 2020 [26], and  
209 numerous devastating outbreaks were described worldwide [27]. Herein, HCWs from LTCFs and  
210 primary care tended to be at higher risk of infection, which probably reflects a lack of extensive  
211 training (associated with large-scale staff turnover), and limited access to PPE and diagnostic

212 tests, with a globally lower awareness on the infectious risk and prevention measures. Support  
213 from hospitals and regional health authorities should be encouraged to continue staff training  
214 and ensure PPE supply. The risk of contracting COVID-19 was also influenced by the professional  
215 category: being nurses and nurse's assistants was more closely associated with COVID-19 than  
216 medical staff. Although those associations might be biased by unbalanced case and control  
217 populations for professions, they might also reflect that nurses and nurse's assistants were  
218 engaged in more prolonged and closer patient care than other professions. This higher risk of  
219 infection was described for domestic cleaners and porters, but not for nurses and nurse's  
220 assistants to our knowledge [5, 10, 21]. The result associated with the "other profession"  
221 category must be interpreted with caution because of the heterogeneity of professions, but  
222 numbers were too small to fit a statistical model to each individual profession.

223 The strengths of this study are the large sample size, enabling exact matching of cases and  
224 controls for age, sex and residential region, adjustment to the week of inclusion, and the  
225 nationwide distribution of study participants. Notably, sources of infection according to  
226 healthcare-facility category has not previously been assessed. The main limitations of the study  
227 are the low response rate of cases and controls and the use of an online questionnaire, which  
228 may have resulted in selection biases towards younger participants, more comfortable with  
229 internet and French language. Second, the underrepresentation of some professional categories  
230 impaired subgroup analyses, despite specific occupational exposures, e.g., physiotherapists or  
231 speech therapists. Third, the data used were relied upon HCW declarations, potentially  
232 influenced by social desirability or memorization bias. Fourth, we did not rule out past or  
233 current asymptomatic infections among controls [28]. Nevertheless, our population was  
234 composed of HCWs, more likely to recognize COVID-19 symptoms and with 3–5-fold higher  
235 access to tests than the general population, then lowering the risk of classification bias [1].

236 Finally, the study took place between April and July 2021, during the third COVID-19 wave in  
237 France. HCWs might have been better prepared and protected than during the first wave,  
238 especially regarding PPE, and the Delta and Omicron variants emerged in France after the end of  
239 the study period. Omicron transmissibility is much higher than previous variants, which may  
240 affect the relative weights of transmission sources and appropriate PPE [29].

241 In conclusion, our study results indicated that, for HCWs, COVID-19 patient-facing activities  
242 increased the risk of getting infected, while colleague-related and mostly community exposures  
243 appear to represent higher risks. Moreover, they suggest that, when caring for COVID-19  
244 patients, HCWs should wear a surgical facemask (apart from aerosols-generating procedures),  
245 eye protection and a gown. The protection conferred by gloving should be further explored.

246

#### 247 **Supplementary Data**

248 Supplementary materials are available at *Clinical Microbiology and Infections* online.

249

#### 250 **Notes**

251 **Funding.** The study was funded by Institut Pasteur and Research, Action Emerging Infectious  
252 Diseases (REACTing), and the French Agency ANRS- Maladies Infectieuses Emergentes (ComCor  
253 project). MB is funded by the ARS Grand Est. AF's laboratory receives support from the Labex  
254 IBEID (ANR-10-LABX-62-IBEID) and the INCEPTION project (PIA/ANR-16-CONV-0005) for studies  
255 on emerging viruses. TC is funded by the Fondation de France (Alliance "Tous unis contre le  
256 virus").

257 **Conflicts of interest.** All authors: no conflict of interest to declare.

258

259

260 **References**

- 261 [1] Nguyen LH, Drew DA, Graham MS, Joshi AD, Guo C-G, Ma W, et al. Risk of COVID-19 among  
262 front-line health-care workers and the general community: a prospective cohort study. *The*  
263 *Lancet Public Health* 2020;5:e475–83. [https://doi.org/10.1016/S2468-2667\(20\)30164-X](https://doi.org/10.1016/S2468-2667(20)30164-X).
- 264 [2] Iversen K, Bundgaard H, Hasselbalch RB, Kristensen JH, Nielsen PB, Pries-Heje M, et al. Risk  
265 of COVID-19 in health-care workers in Denmark: an observational cohort study. *Lancet*  
266 *Infect Dis* 2020;20:1401–8. [https://doi.org/10.1016/S1473-3099\(20\)30589-2](https://doi.org/10.1016/S1473-3099(20)30589-2).
- 267 [3] World Health Organization. The impact of COVID-19 on health and care workers: a closer  
268 look at deaths. World Health Organization; 2021.
- 269 [4] Recensement national des cas de COVID-19 chez les professionnels en établissements de  
270 santé. [https://www.santepubliquefrance.fr/etudes-et-enquetes/recensement-national-](https://www.santepubliquefrance.fr/etudes-et-enquetes/recensement-national-des-cas-de-covid-19-chez-les-professionnels-en-etablissements-de-sante)  
271 [des-cas-de-covid-19-chez-les-professionnels-en-etablissements-de-sante](https://www.santepubliquefrance.fr/etudes-et-enquetes/recensement-national-des-cas-de-covid-19-chez-les-professionnels-en-etablissements-de-sante).
- 272 [5] Eyre DW, Lumley SF, O’Donnell D, Campbell M, Sims E, Lawson E, et al. Differential  
273 occupational risks to healthcare workers from SARS-CoV-2 observed during a prospective  
274 observational study. *Elife* 2020;9. <https://doi.org/10.7554/eLife.60675>.
- 275 [6] Lentz RJ, Colt H, Chen H, Cordovilla R, Popevic S, Tahura S, et al. Assessing coronavirus  
276 disease 2019 (COVID-19) transmission to healthcare personnel: The global ACT-HCP case-  
277 control study. *Infect Control Hosp Epidemiol* 2021;42:381–7.  
278 <https://doi.org/10.1017/ice.2020.455>.
- 279 [7] Weinberger T, Steffen J, Osterman A, Mueller TT, Muenchhoff M, Wratil PR, et al.  
280 Prospective Longitudinal Serosurvey of Health Care Workers in the First Wave of the SARS-  
281 CoV-2 Pandemic in a Quaternary Care Hospital in Munich, Germany. *Clin Infect Dis*  
282 2021;73:e3055–65. <https://doi.org/10.1093/cid/ciaa1935>.

- 283 [8] Li J, Huang DQ, Zou B, Yang H, Hui WZ, Rui F, et al. Epidemiology of COVID-19: A systematic  
284 review and meta-analysis of clinical characteristics, risk factors, and outcomes. *J Med Virol*  
285 2021;93:1449–58. <https://doi.org/10.1002/jmv.26424>.
- 286 [9] Contejean A, Leporrier J, Canouï E, Fourgeaud J, Mariaggi A-A, Alby-Laurent F, et al.  
287 Transmission Routes of Severe Acute Respiratory Syndrome Coronavirus 2 Among  
288 Healthcare Workers of a French University Hospital in Paris, France. *Open Forum Infect Dis*  
289 2021;8:ofab054. <https://doi.org/10.1093/ofid/ofab054>.
- 290 [10] Howard-Anderson J, Adams C, Sherman AC, Dube WC, Smith TC, Edupuganti N, et al.  
291 Occupational Risk Factors for SARS-CoV-2 Infection among Healthcare Personnel: A Cross-  
292 Sectional Analysis of Subjects Enrolled in the COPE Study. *Infect Control Hosp Epidemiol*  
293 2021;1–20. <https://doi.org/10.1017/ice.2021.54>.
- 294 [11] Bartoszko JJ, Farooqi MAM, Alhazzani W, Loeb M. Medical masks vs N95 respirators for  
295 preventing COVID-19 in healthcare workers: A systematic review and meta-analysis of  
296 randomized trials. *Influenza Other Respir Viruses* 2020;14:365–73.  
297 <https://doi.org/10.1111/irv.12745>.
- 298 [12] Chu DK, Akl EA, Duda S, Solo K, Yaacoub S, Schünemann HJ, et al. Physical distancing, face  
299 masks, and eye protection to prevent person-to-person transmission of SARS-CoV-2 and  
300 COVID-19: a systematic review and meta-analysis. *Lancet* 2020;395:1973–87.  
301 [https://doi.org/10.1016/S0140-6736\(20\)31142-9](https://doi.org/10.1016/S0140-6736(20)31142-9).
- 302 [13] Abbas M, Goto M, Tartari E, Perencevich E, Pittet D. Revisiting the evidence for physical  
303 distancing, face masks, and eye protection. *The Lancet* 2021;398:661–3.  
304 [https://doi.org/10.1016/S0140-6736\(21\)01739-6](https://doi.org/10.1016/S0140-6736(21)01739-6).
- 305 [14] Al-Kuwari MG, AbdulMalik MA, Al-Nuaimi AA, Abdulmajeed J, Al-Romaihi HE, Semaan S, et  
306 al. Epidemiology Characteristics of COVID-19 Infection Amongst Primary Health Care

- 307 Workers in Qatar: March-October 2020. *Front Public Health* 2021;9:679254.  
308 <https://doi.org/10.3389/fpubh.2021.679254>.
- 309 [15] Ladhani SN, Chow JY, Janarthanan R, Fok J, Crawley-Boevey E, Vusirikala A, et al. Increased  
310 risk of SARS-CoV-2 infection in staff working across different care homes: enhanced CoVID-  
311 19 outbreak investigations in London care Homes. *J Infect* 2020;81:621–4.  
312 <https://doi.org/10.1016/j.jinf.2020.07.027>.
- 313 [16] Galmiche S, Charmet T, Schaeffer L, Paireau J, Grant R, Chény O, et al. Exposures associated  
314 with SARS-CoV-2 infection in France: A nationwide online case-control study. *Lancet Reg  
315 Health Eur* 2021;7:100148. <https://doi.org/10.1016/j.lanepe.2021.100148>.
- 316 [17] Charmet T, Schaeffer L, Grant R, Galmiche S, Chény O, Von Platen C, et al. Impact of  
317 original, B.1.1.7, and B.1.351/P.1 SARS-CoV-2 lineages on vaccine effectiveness of two  
318 doses of COVID-19 mRNA vaccines: Results from a nationwide case-control study in France.  
319 *Lancet Reg Health Eur* 2021;8:100171. <https://doi.org/10.1016/j.lanepe.2021.100171>.
- 320 [18] Grant R, Charmet T, Schaeffer L, Galmiche S, Madec Y, Von Platen C, et al. Impact of SARS-  
321 CoV-2 Delta variant on incubation, transmission settings and vaccine effectiveness: Results  
322 from a nationwide case-control study in France. *The Lancet Regional Health - Europe*  
323 2021:100278. <https://doi.org/10.1016/j.lanepe.2021.100278>.
- 324 [19] Hall VJ, Foulkes S, Saei A, Andrews N, Oguti B, Charlett A, et al. COVID-19 vaccine coverage  
325 in health-care workers in England and effectiveness of BNT162b2 mRNA vaccine against  
326 infection (SIREN): a prospective, multicentre, cohort study. *Lancet* 2021;397:1725–35.  
327 [https://doi.org/10.1016/S0140-6736\(21\)00790-X](https://doi.org/10.1016/S0140-6736(21)00790-X).
- 328 [20] Sims MD, Maine GN, Childers KL, Podolsky RH, Voss DR, Berkiw-Scenna N, et al. COVID-19  
329 seropositivity and asymptomatic rates in healthcare workers are associated with job

- 330 function and masking. *Clin Infect Dis* 2021;73:S154–62.
- 331 <https://doi.org/10.1093/cid/ciaa1684>.
- 332 [21] Tian C, Lovrics O, Vaisman A, Chin KJ, Tomlinson G, Lee Y, et al. Risk factors and protective  
333 measures for healthcare worker infection during highly infectious viral respiratory  
334 epidemics: a systematic review and meta-analysis. *Infect Control Hosp Epidemiol* 2021;1–  
335 102. <https://doi.org/10.1017/ice.2021.18>.
- 336 [22] Covid-19, infection par le SARS-CoV-2. [https://www.sf2h.net/publications/coronavirus-](https://www.sf2h.net/publications/coronavirus-2019-ncov)  
337 2019-ncov.
- 338 [23] Szajek K, Fleisch F, Hutter S, Risch M, Bechmann T, Luyckx VA, et al. Healthcare institutions’  
339 recommendation regarding the use of FFP-2 masks and SARS-CoV-2 seropositivity among  
340 healthcare workers: a multicenter longitudinal cohort study. *Antimicrobial Resistance &*  
341 *Infection Control* 2022;11:6. <https://doi.org/10.1186/s13756-021-01047-x>.
- 342 [24] Byambasuren O, Beller E, Clark J, Collignon P, Glasziou P. The effect of eye protection on  
343 SARS-CoV-2 transmission: a systematic review. *Antimicrobial Resistance & Infection*  
344 *Control* 2021;10:156. <https://doi.org/10.1186/s13756-021-01025-3>.
- 345 [25] Alzunitan MA, Perencevich EN, Edmond MB. Assessing health care worker perceptions of  
346 face coverings during the COVID-19 pandemic. *Am J Infect Control* 2021;49:521–2.  
347 <https://doi.org/10.1016/j.ajic.2020.09.006>.
- 348 [26] En 2020, trois Ehpad sur quatre ont eu au moins un résident infecté par la Covid-19 |  
349 Direction de la recherche, des études, de l’évaluation et des statistiques.  
350 [https://drees.solidarites-sante.gouv.fr/publications/etudes-et-resultats/en-2020-trois-](https://drees.solidarites-sante.gouv.fr/publications/etudes-et-resultats/en-2020-trois-ehpad-sur-quatre-ont-eu-au-moins-un-resident-infecte)  
351 [ehpad-sur-quatre-ont-eu-au-moins-un-resident-infecte](https://drees.solidarites-sante.gouv.fr/publications/etudes-et-resultats/en-2020-trois-ehpad-sur-quatre-ont-eu-au-moins-un-resident-infecte).
- 352 [27] Hashan MR, Smoll N, King C, Ockenden-Muldoon H, Walker J, Wattiaux A, et al.  
353 Epidemiology and clinical features of COVID-19 outbreaks in aged care facilities: A

354 systematic review and meta-analysis. *EClinicalMedicine* 2021;33:100771.

355 <https://doi.org/10.1016/j.eclinm.2021.100771>.

356 [28] He J, Guo Y, Mao R, Zhang J. Proportion of asymptomatic coronavirus disease 2019: A

357 systematic review and meta-analysis. *J Med Virol* 2021;93:820–30.

358 <https://doi.org/10.1002/jmv.26326>.

359 [29] Nishiura H, Ito K, Anzai A, Kobayashi T, Piantham C, Rodríguez-Morales AJ. Relative

360 Reproduction Number of SARS-CoV-2 Omicron (B.1.1.529) Compared with Delta Variant in

361 South Africa. *Journal of Clinical Medicine* 2022;11:30.

362 <https://doi.org/10.3390/jcm11010030>.

363



364 **Table 1.** Study population and infection determinants: description and results of the univariable and multivariable conditional logistic  
 365 regression analyses adjusted to the week of inclusion.

| Characteristic                                              | Cases<br>n = 2076 | Controls<br>n = 2076 | aOR (95% CI)            |                         |
|-------------------------------------------------------------|-------------------|----------------------|-------------------------|-------------------------|
|                                                             |                   |                      | Univariable analysis    | Multivariable analysis  |
| <b>Characteristic</b>                                       |                   |                      |                         |                         |
| Age category, years                                         |                   |                      |                         |                         |
| [18–28]                                                     | 281 (14)          | 281 (14)             |                         |                         |
| [29–38]                                                     | 639 (31)          | 639 (31)             |                         |                         |
| [39–48]                                                     | 616 (30)          | 616 (30)             |                         |                         |
| [49+]                                                       | 540 (26)          | 540 (26)             |                         |                         |
| Female sex                                                  | 1762 (85)         | 1762 (85)            |                         |                         |
| At least one comorbidity <sup>a</sup>                       | 305 (15)          | 235 (11)             | <b>1.38 (1.10–1.74)</b> | 1.28 (0.92–1.78)        |
| Smoker                                                      | 367 (18)          | 337 (16)             | 1.21 (0.98–1.49)        | 0.82 (0.60–1.11)        |
| COVID-19 immunization                                       |                   |                      |                         |                         |
| None                                                        | 1552 (75)         | 817 (39)             | Reference               | Reference               |
| Partial                                                     | 312 (15)          | 532 (26)             | <b>0.30 (0.24–0.38)</b> | <b>0.30 (0.22–0.40)</b> |
| Complete                                                    | 206 (10)          | 720 (35)             | <b>0.21 (0.16–0.27)</b> | <b>0.19 (0.14–0.27)</b> |
| Healthcare sector                                           |                   |                      |                         |                         |
| Hospital                                                    | 694 (33)          | 800 (39)             | Reference               | Reference               |
| Long-term-care facility                                     | 372 (18)          | 291 (14)             | <b>1.58 (1.25–2.01)</b> | 1.11 (0.77–1.61)        |
| Primary care                                                | 1010 (49)         | 985 (47)             | 1.14 (0.96–1.36)        | <b>1.70 (1.28–2.26)</b> |
| HCWs Professional category                                  |                   |                      |                         |                         |
| Medical professions                                         | 174 (8)           | 552 (27)             | Reference               | Reference               |
| Nurses                                                      | 451 (22)          | 401 (19)             | <b>5.87 (4.30–8.02)</b> | <b>3.79 (2.50–5.76)</b> |
| Nurse’s assistants                                          | 357 (17)          | 126 (6)              | <b>14.2 (9.81–20.4)</b> | <b>9.08 (5.30–15.5)</b> |
| Others                                                      | 1094 (53)         | 997 (48)             | <b>4.22 (3.23–5.51)</b> | <b>2.16 (1.52–3.08)</b> |
| <b>Exposures during the 10 days preceding inclusion</b>     |                   |                      |                         |                         |
| Regular COVID-19 patient-facing activities                  | 393 (19)          | 285 (14)             | <b>1.63 (1.31–2.03)</b> | <b>2.37 (1.66–3.40)</b> |
| Exposure to an infected colleague <sup>b</sup>              | 339 (17)          | 111 (5)              | <b>3.31 (2.48–4.43)</b> | <b>2.26 (1.53–3.33)</b> |
| Exposure to an infected person outside of work <sup>b</sup> | 434 (22)          | 47 (2)               | <b>11.3 (7.74–16.6)</b> | <b>19.9 (12.4–31.9)</b> |
| Professional cluster (patients and/or HCWs) <sup>b</sup>    | 376 (19)          | 172 (8)              | <b>2.70 (2.09–3.49)</b> | <b>2.14 (1.50–3.06)</b> |

**For COVID-19 patients care<sup>c</sup>, systematic use of**

|                                        |          |           |                         |                         |
|----------------------------------------|----------|-----------|-------------------------|-------------------------|
| Mask type                              |          |           |                         |                         |
| Surgical facemask                      | 331 (30) | 253 (25)  | —                       | —                       |
| Cloth mask                             | 8 (<1)   | 4 (<1)    | 1.46 (0.35–6.14)        | 1.67 (0.18–15.8)        |
| N95 respirator                         | 749 (69) | 741 (74)  | <b>0.64 (0.50–0.83)</b> | 0.85 (0.55–1.29)        |
| Gloves                                 | 883 (81) | 725 (73)  | <b>1.37 (1.06–1.78)</b> | 1.44 (0.87–2.39)        |
| Eye protection (goggles or faceshield) | 653 (60) | 692 (69)  | <b>0.58 (0.46–0.73)</b> | <b>0.57 (0.37–0.87)</b> |
| Gown                                   | 813 (75) | 803 (81)  | <b>0.68 (0.52–0.89)</b> | <b>0.58 (0.34–0.97)</b> |
| Apron                                  | 625 (57) | 521 (52)  | <b>1.29 (1.03–1.62)</b> | <b>1.47 (1.00–2.18)</b> |
| Did not care to COVID-19 patients      | 988 (48) | 1078 (52) | —                       | —                       |

366 Results are presented as number (%), and adjusted odds ratios [aOR] (95% confidence intervals [CI]).

367 <sup>a</sup>Comorbidity among: diabetes, arterial hypertension, myocardial infarction and/or chronic pulmonary disease.

368 <sup>b</sup>Analysis computed with multiple imputations for missing data.

369 <sup>c</sup>For personal protective equipment use, percentages were calculated based on the number of HCWs who cared to COVID-19 patients during  
 370 the 10 past days (1088 cases and 998 controls).

371

372

373

374

375

376

377

378

379

380

381 **Figure legends**

382

383 **Figure 1.** Flow chart of study participants. HCWs, healthcare workers; IPSOS, French marketing-  
384 research and public-opinion specialist.

385 **Figure 2.** Weekly number of inclusions of cases (red bars) and controls (blue bars). The black line  
386 shows the weekly number of laboratory-confirmed cases reported in France throughout the  
387 study period (source: *Santé Publique France*).

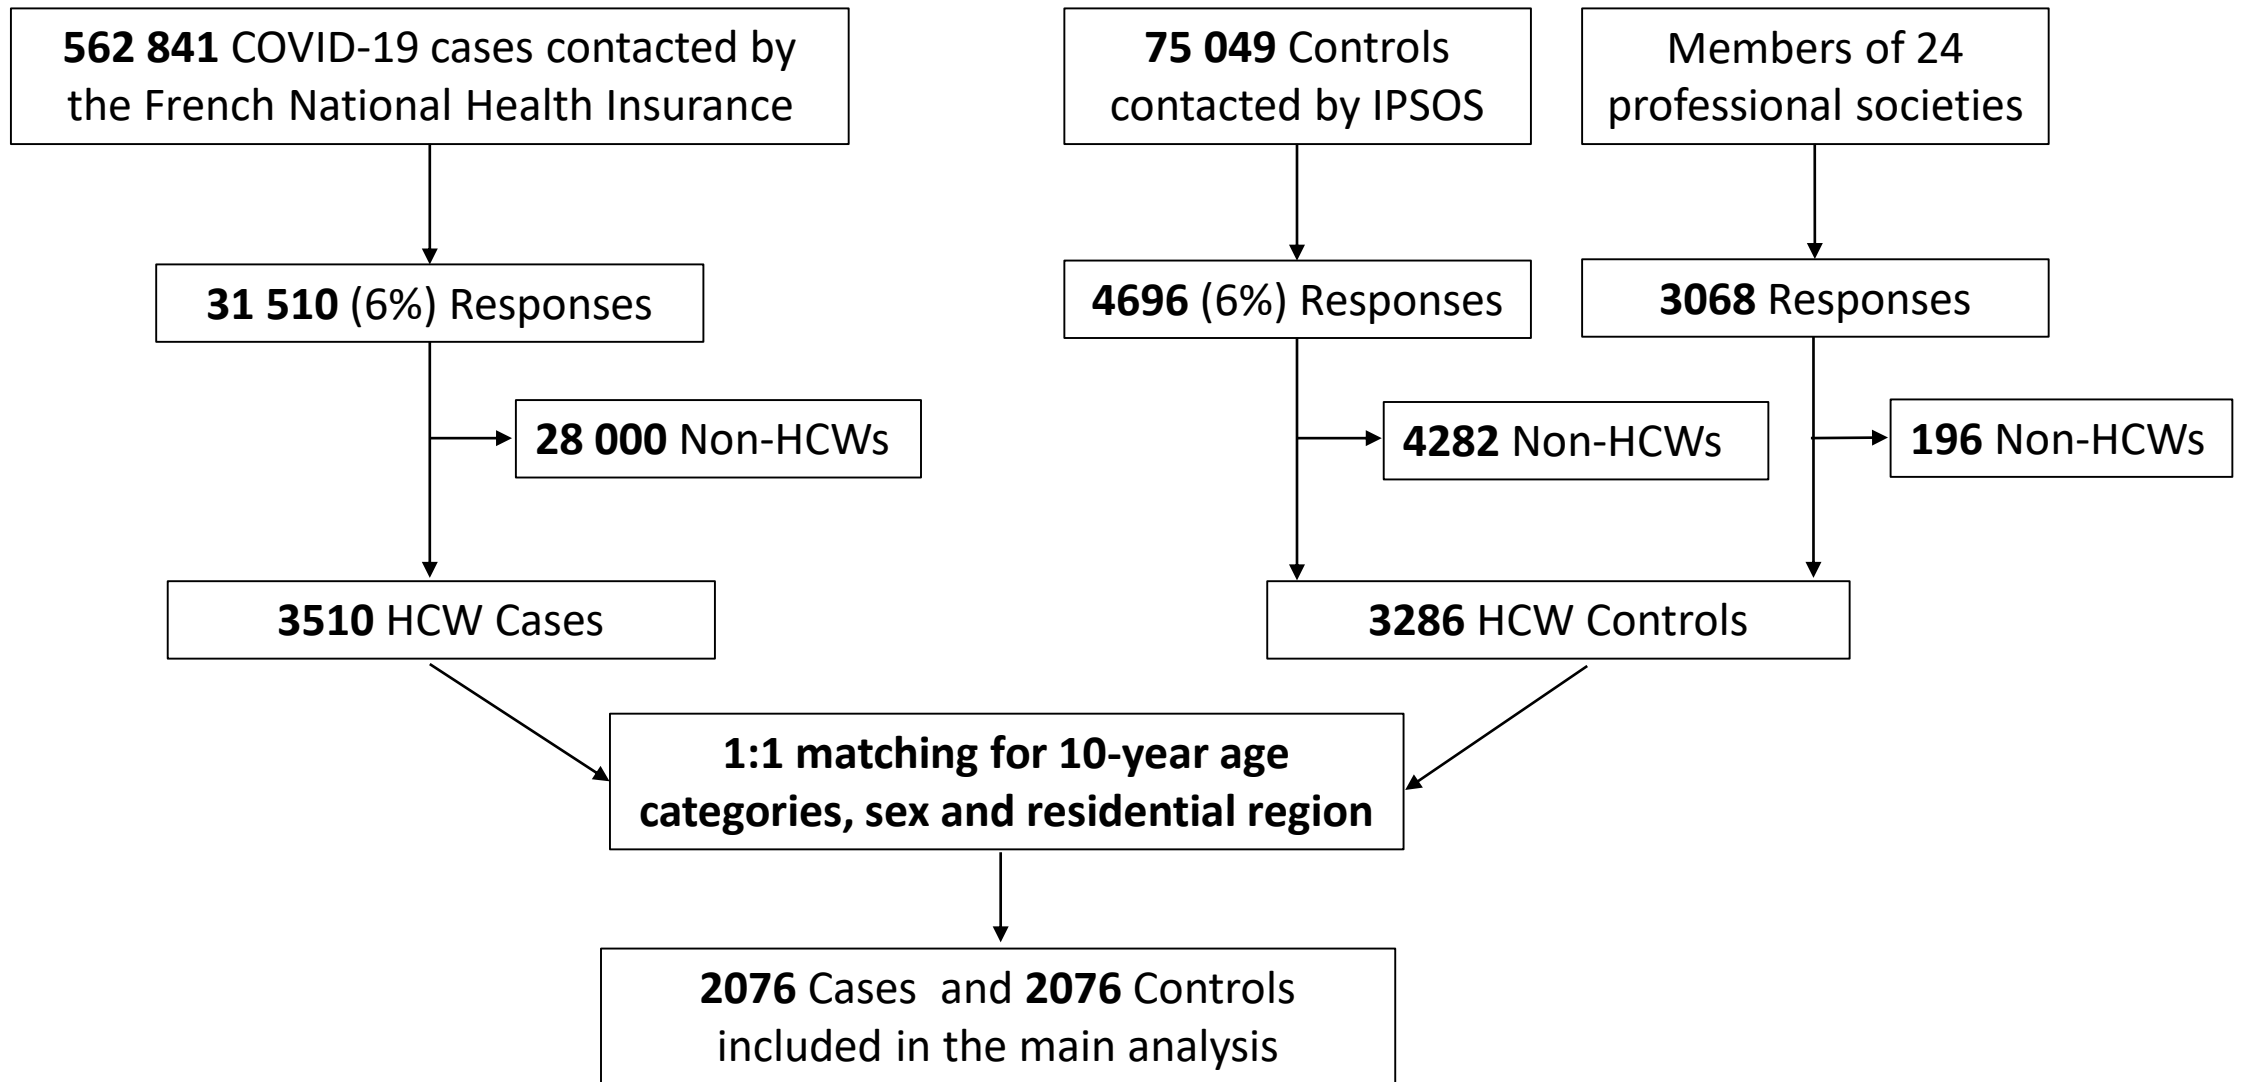

medRxiv preprint doi: <https://doi.org/10.1101/2022.02.26.22271545>; this version posted February 27, 2022. The copyright holder for this preprint (which was not certified by peer review) is the author/funder, who has granted medRxiv a license to display the preprint in perpetuity. All rights reserved. No reuse allowed without permission.

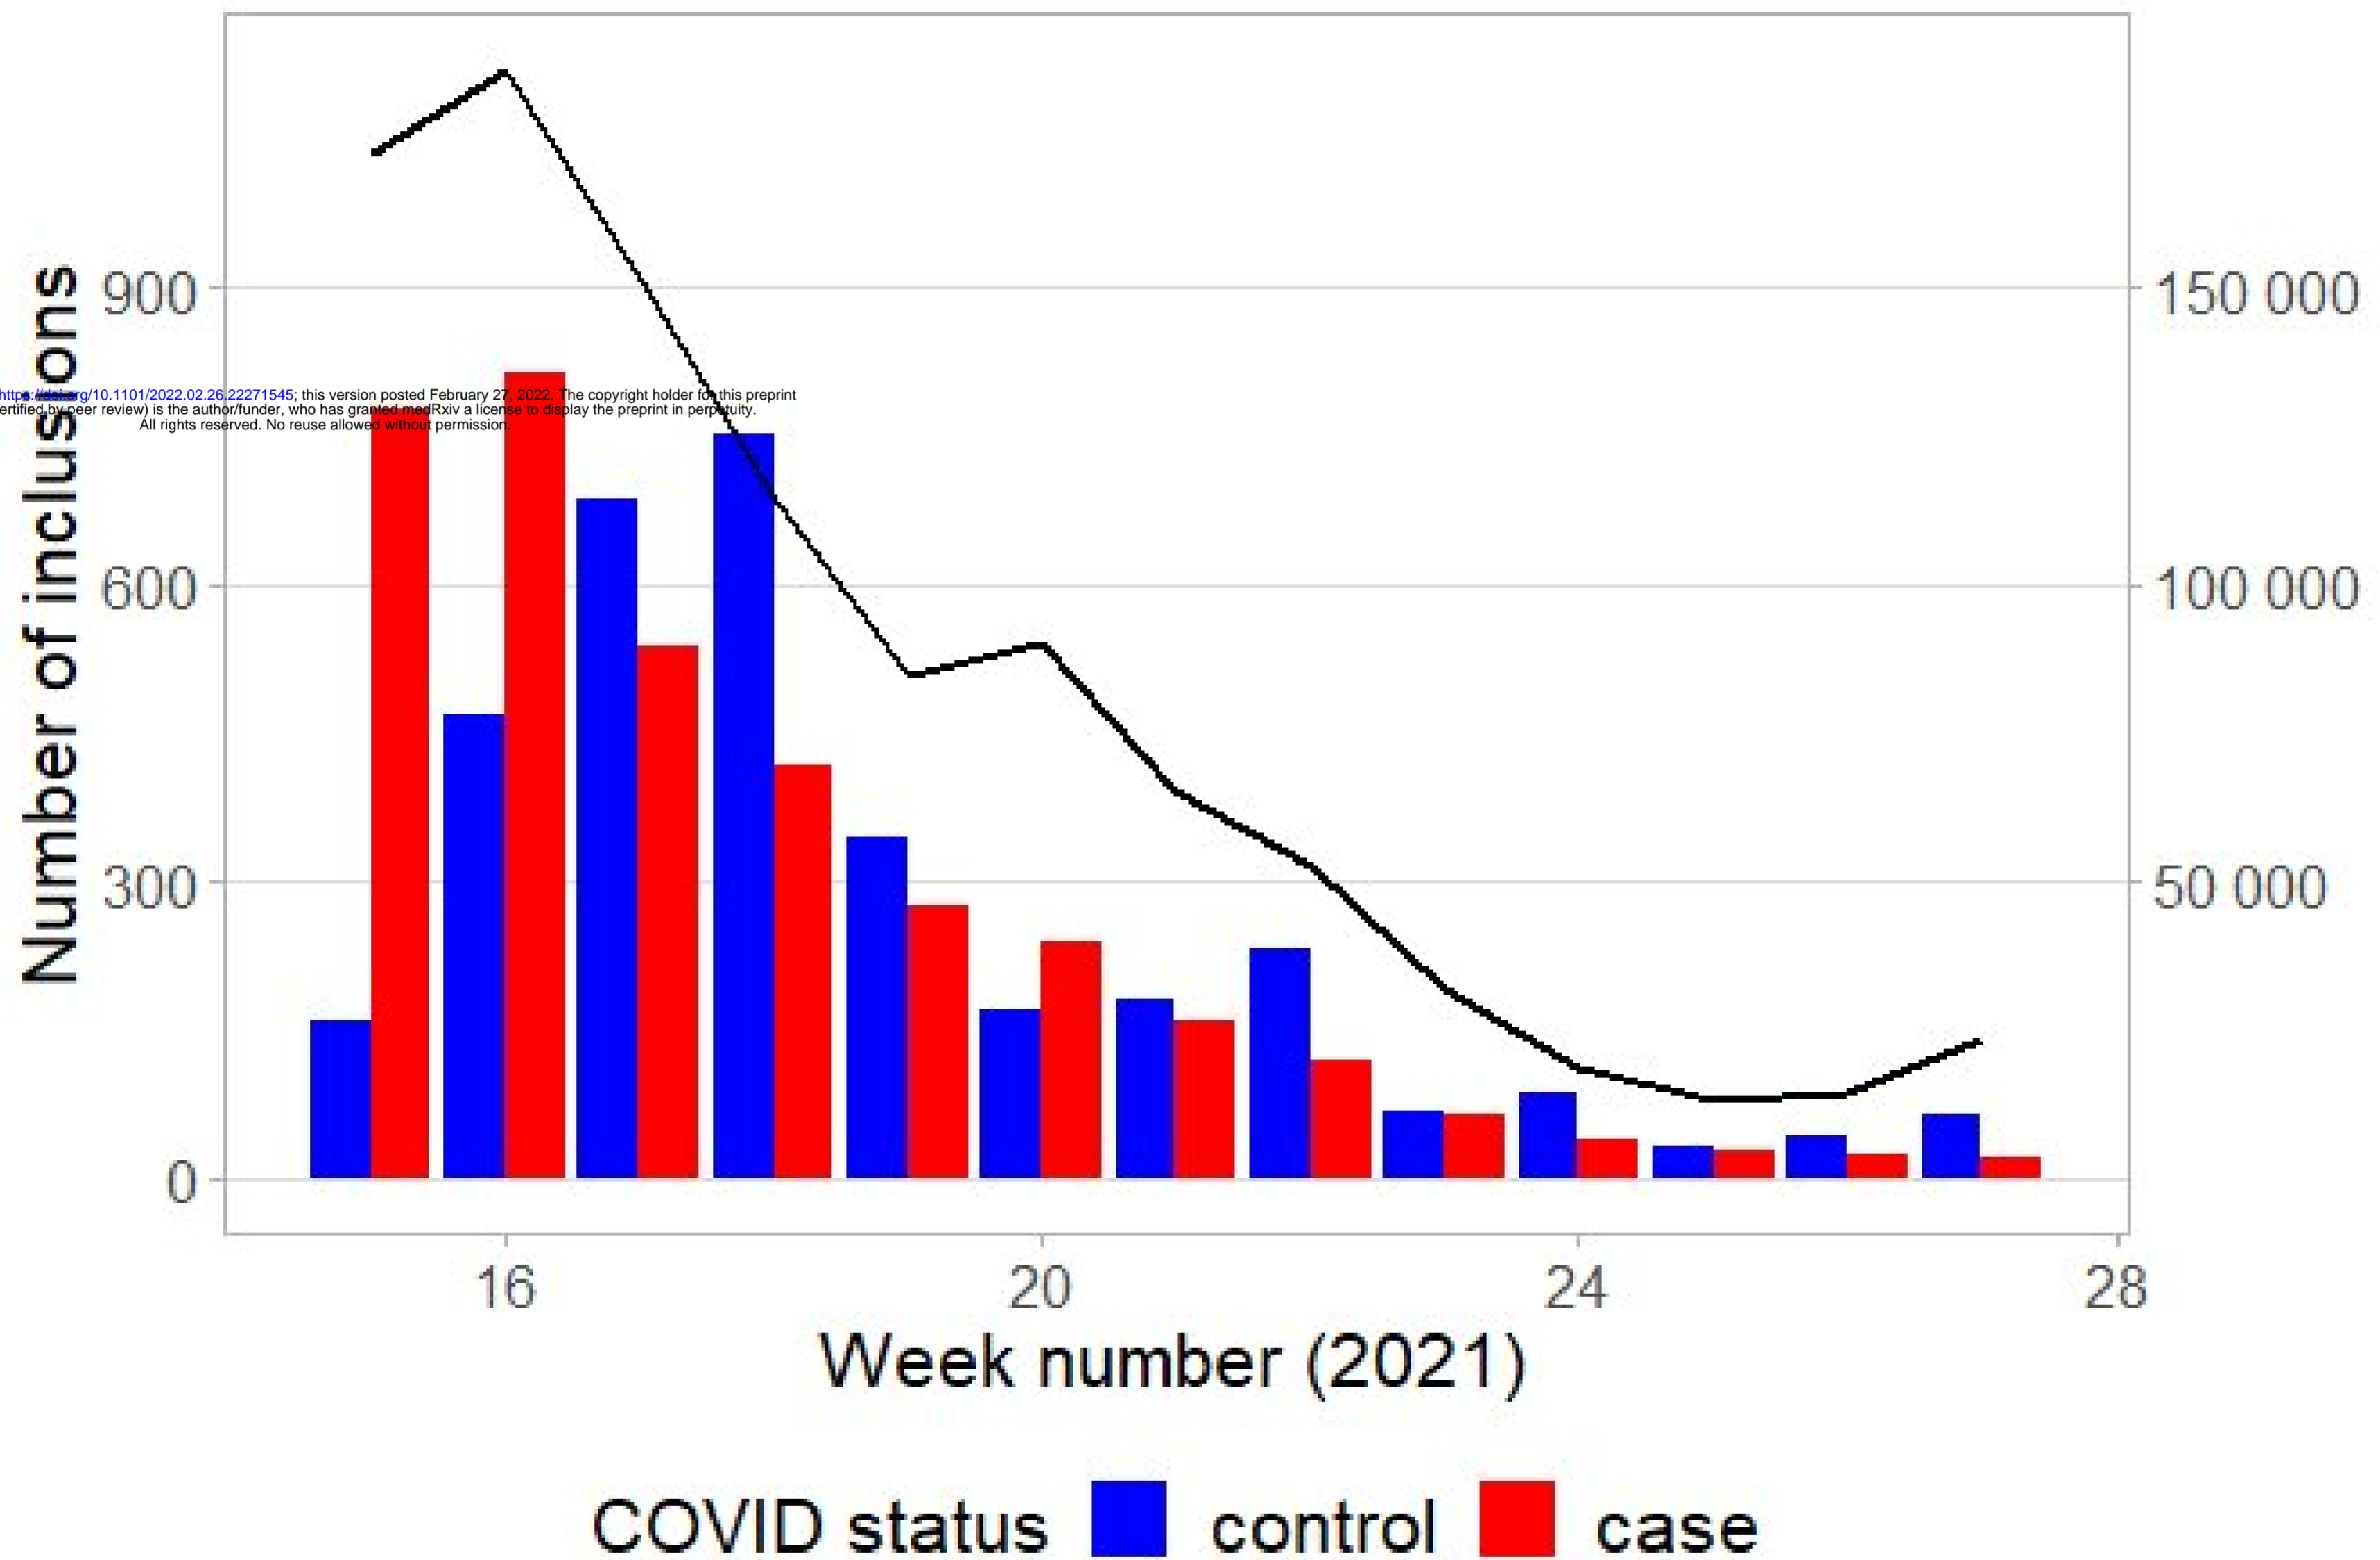

Source: https://medrxiv.org/content/10.1101/2022.02.26.22271545v1.full.pdf
