# Supplementary material for: SARS-CoV-2 Exposures of Healthcare Workers from Primary Care, Long-Term Care Facilities and Hospitals: A Nationwide Matched Case-Control Study
Source: bioRxiv or medRxiv preprint supplement (doi:10.1101/2022.02.26.22271545), 2022-02-27
Supplement: Supplementary file [file media-1.pdf]

1 **Supplementary Table 1.** Complete cases population and infection determinants: description and results of the univariable and multivariable  
 2 conditional logistic regression analyses adjusted to the week of inclusion.

| Characteristics                                                  | Cases<br>n = 2001 | Controls<br>n = 2001 | aOR (95% CI)            |                         |
|------------------------------------------------------------------|-------------------|----------------------|-------------------------|-------------------------|
|                                                                  |                   |                      | Univariable analysis    | Multivariable analysis  |
| <b>Characteristics</b>                                           |                   |                      |                         |                         |
| Age categories, years                                            |                   |                      |                         |                         |
| [18–28]                                                          | 269 (13)          | 269 (13)             |                         |                         |
| [29–38]                                                          | 618 (31)          | 618 (31)             |                         |                         |
| [39–48]                                                          | 595 (30)          | 595 (30)             |                         |                         |
| [49+]                                                            | 519 (26)          | 519 (26)             |                         |                         |
| Female sex                                                       | 1708 (85)         | 1708 (85)            |                         |                         |
| At least one comorbidity <sup>a</sup>                            | 301 (15)          | 223 (11)             | <b>1.47 (1.16–1.87)</b> | 1.26 (0.89–1.78)        |
| Smoker                                                           | 355 (18)          | 334 (17)             | 1.04 (0.85–1.28)        | <b>0.68 (0.50–0.91)</b> |
| COVID-19 immunization                                            |                   |                      |                         |                         |
| None                                                             | 1471 (74)         | 761 (38)             | Reference               | Reference               |
| Partial                                                          | 316 (16)          | 520 (26)             | <b>0.33 (0.26–0.41)</b> | <b>0.32 (0.24–0.44)</b> |
| Complete                                                         | 206 (10)          | 712 (36)             | <b>0.21 (0.16–0.26)</b> | <b>0.16 (0.11–0.23)</b> |
| Healthcare sector                                                |                   |                      |                         |                         |
| Hospital                                                         | 711 (36)          | 802 (40)             | —                       | —                       |
| Long-term care facility                                          | 379 (19)          | 261 (13)             | <b>1.78 (1.39–2.29)</b> | 1.41 (0.97–2.05)        |
| Primary care                                                     | 911 (46)          | 938 (47)             | 0.99 (0.83–1.18)        | <b>1.55 (1.15–2.08)</b> |
| HCW Professional category                                        |                   |                      |                         |                         |
| Medical professions                                              | 171 (8)           | 559 (28)             | —                       | —                       |
| Nurses                                                           | 454 (23)          | 386 (19)             | <b>5.77 (4.25–7.83)</b> | <b>5.16 (3.37–7.89)</b> |
| Nurse’s aides                                                    | 364 (18)          | 115 (6)              | <b>15.2 (10.4–22.2)</b> | <b>9.32 (5.38–16.1)</b> |
| Others                                                           | 1012 (51)         | 941 (47)             | <b>4.00 (3.08–5.19)</b> | <b>2.43 (1.70–3.48)</b> |
| <b>Exposures during the 10 days preceding inclusion</b>          |                   |                      |                         |                         |
| Regular COVID-19 patient-facing activities                       | 407 (20)          | 288 (14)             | <b>1.64 (1.32–2.04)</b> | <b>1.93 (1.34–2.79)</b> |
| Exposure to an infected colleague                                | 351 (18)          | 108 (5)              | <b>3.59 (2.70–4.79)</b> | <b>2.92 (1.95–4.38)</b> |
| Exposure to an infected person outside of work                   | 444 (22)          | 44 (2)               | <b>15.5 (10.1–23.8)</b> | <b>26.8 (16.0–44.7)</b> |
| Professional cluster (patients and/or HCWs)                      | 391 (20)          | 177 (9)              | <b>2.53 (1.98–3.23)</b> | <b>1.94 (1.36–2.77)</b> |
| <b>For COVID-19 patients<sup>b</sup> care, systematic use of</b> |                   |                      |                         |                         |

|                                        |          |           |                         |                         |
|----------------------------------------|----------|-----------|-------------------------|-------------------------|
| Mask type                              |          |           |                         |                         |
| Surgical facemask                      | 340 (30) | 255 (26)  | —                       | —                       |
| Cloth mask                             | 8 (1)    | 2 (<1)    | 1.89 (0.34–10.7)        | 1.26 (0.12–12.8)        |
| N95 respirator                         | 770 (69) | 742 (74)  | <b>0.65 (0.51–0.83)</b> | 0.84 (0.54–1.31)        |
| Gloves                                 | 905 (81) | 717 (72)  | <b>1.50 (1.16–1.94)</b> | 1.32 (0.79–2.20)        |
| Eye protection (goggles or faceshield) | 668 (60) | 691 (69)  | <b>0.54 (0.43–0.68)</b> | <b>0.47 (0.31–0.73)</b> |
| Gown                                   | 834 (75) | 800 (80)  | <b>0.67 (0.51–0.87)</b> | 0.65 (0.38–1.11)        |
| Apron                                  | 642 (57) | 523 (52)  | <b>1.43 (1.15–1.78)</b> | <b>1.62 (1.09–2.40)</b> |
| Did not care for COVID-19 patients     | 883 (44) | 1002 (50) | —                       | —                       |

3 Results are expressed as n (%) and adjusted odds ratios (aOR) (95% confidence intervals (CI)).

4 <sup>a</sup>Comorbidity among: diabetes, arterial hypertension, myocardial infarction and/or chronic pulmonary disease.

5 <sup>b</sup>For personal protective equipment use, percentages were calculated on the number of HCWs who cared to COVID-19 patients in the ten past  
6 days (1118 cases and 999 controls). HCWs, healthcare worker ; PPE, personal protective equipment.

7

8 **Supplementary Table 2** Healthcare workers' use of personal protective equipment for COVID-19-patient care across the three healthcare  
 9 settings during the 10 days preceding inclusion.

|                                        | Hospital         |                     | Long-term-care facility |                     | Primary care     |                     |
|----------------------------------------|------------------|---------------------|-------------------------|---------------------|------------------|---------------------|
|                                        | Cases<br>n = 694 | Controls<br>n = 694 | Cases<br>n = 279        | Controls<br>n = 279 | Cases<br>n = 921 | Controls<br>n = 921 |
| Personal protective equipment          |                  |                     |                         |                     |                  |                     |
| Mask                                   |                  |                     |                         |                     |                  |                     |
| Surgical facemask                      | 83 (18)          | 102 (22)            | 67 (44)                 | 64 (43)             | 151 (40)         | 78 (25)             |
| N95 respirator                         | 383 (82)         | 355 (78)            | 85 (56)                 | 84 (57)             | 226 (60)         | 237 (75)            |
| Gloves                                 | 409 (88)         | 351 (77)            | 127 (84)                | 113 (76)            | 258 (68)         | 205 (65)            |
| Eye protection (goggles or faceshield) | 346 (74)         | 351 (77)            | 86 (57)                 | 113 (76)            | 173 (46)         | 167 (53)            |
| Gown                                   | 408 (88)         | 388 (85)            | 102 (67)                | 118 (80)            | 228 (60)         | 214 (68)            |
| Apron                                  | 324 (70)         | 277 (61)            | 92 (61)                 | 110 (74)            | 138 (37)         | 101 (32)            |
| Did not care for COVID-19 patients     | 228 (33)         | 238 (34)            | 127 (45)                | 131 (47)            | 544 (59)         | 606 (66)            |

10 Results are expressed as number (%).

11

12

13

14

15

16

17

18

19

20

21 **Supplementary Table 3.** Infection determinants of subgroup multivariable conditional logistic regression analysis according to healthcare  
 22 setting.

|                                                         | Hospital<br>n = 694 cases/694 controls | Long-term-care facility<br>n = 279 cases/279 controls | Primary care<br>n = 921 cases/921 controls |
|---------------------------------------------------------|----------------------------------------|-------------------------------------------------------|--------------------------------------------|
| <b>Characteristic</b>                                   |                                        |                                                       |                                            |
| At least one comorbidity <sup>a</sup>                   | 1.76 (0.99–3.12)                       | 1.26 (0.40–3.96)                                      | 0.90 (0.50–1.62)                           |
| Smoker                                                  | 0.77 (0.46–1.28)                       | 0.60 (0.24–1.50)                                      | 1.04 (0.63–1.71)                           |
| COVID-19 immunization                                   |                                        |                                                       |                                            |
| None                                                    | Reference                              | Reference                                             | Reference                                  |
| Partial                                                 | <b>0.15 (0.08–0.27)</b>                | <b>0.09 (0.02–0.37)</b>                               | <b>0.34 (0.22–0.53)</b>                    |
| Complete                                                | <b>0.12 (0.06–0.22)</b>                | <b>0.13 (0.04–0.50)</b>                               | <b>0.16 (0.09–0.30)</b>                    |
| <b>Exposures during the 10 days preceding inclusion</b> |                                        |                                                       |                                            |
| Regular COVID-19-patient-facing activities              | <b>1.95 (1.15–3.28)</b>                | <b>0.19 (0.04–0.97)</b>                               | <b>3.64 (1.59–8.34)</b>                    |
| Exposure to an infected colleague                       | 1.18 (0.66–2.09)                       | 4.34 (0.97–19.4)                                      | <b>6.94 (2.45–19.6)</b>                    |
| Exposure to an infected person outside of work          | <b>15.7 (7.38–33.5)</b>                | <b>18.4 (4.53–74.3)</b>                               | <b>19.8 (9.51–41.3)</b>                    |
| Professional cluster (patients and/or HCWs)             | <b>2.08 (1.19–3.63)</b>                | 3.85 (0.79–18.7)                                      | 1.97 (0.97–3.99)                           |
| <b>For COVID-19-patients care, systematic use of</b>    |                                        |                                                       |                                            |
| Mask type                                               |                                        |                                                       |                                            |
| Surgical facemask                                       | Reference                              | Reference                                             | Reference                                  |
| N95 respirator                                          | 1.68 (0.79–3.56)                       | 1.23 (0.30–5.01)                                      | 0.61 (0.28–1.32)                           |
| Gloves                                                  | 1.29 (0.58–2.87)                       | 0.97 (0.11–8.69)                                      | 2.50 (0.97–6.45)                           |
| Eye protection (goggles or faceshield)                  | 0.90 (0.46–1.77)                       | 0.30 (0.04–2.12)                                      | 1.03 (0.50–2.11)                           |
| Gown                                                    | 0.70 (0.30–1.62)                       | 0.33 (0.03–3.37)                                      | 0.61 (0.27–1.41)                           |
| Apron                                                   | 1.18 (0.66–2.11)                       | 1.28 (0.25–6.47)                                      | 1.58 (0.83–3.01)                           |

23 Results are presented as n (%), and adjusted Odds Ratios [aOR] (95% Confidence Intervals [CI]).

24 <sup>a</sup> Comorbidity among: diabetes, arterial hypertension, myocardial infarction and/or chronic pulmonary disease. HCWs, healthcare worker ; PPE,  
 25 personal protective equipment.
